# Supplementary material for: Neurosurgery outcomes and complications in a monocentric 7-year patient registry
Source: PubMed Central journal article supplement (PMC9560692; doi:10.1016/j.bas.2022.100860), 2022-01-19

## Supplementary Content: Electronic Case Report Forms

|     |                                         |   |
|-----|-----------------------------------------|---|
| 1   | Admission Case Report Form (aCRF).....  | 2 |
| 2   | Surgery Case Report Form (sCRF).....    | 3 |
| 2.1 | Lokalisation .....                      | 4 |
| 3   | Discharge Case Report Form (dCRF) ..... | 5 |
| 4   | Follow-up Case Report Form (fCRF).....  | 7 |

# 1 Admission Case Report Form (aCRF)

CRF-Eintritt

Kaderarzt Visum

## Komplikationen

Führten Komplikationen zum Eintritt?  nein

## Soziales Umfeld und Ressourcen (Fragen an den Patienten)

### Wohnsituation

- Einpersonenhaushalt
- Mehrpersonenhaushalt

### Lebt im Haushalt eine Person, die sich um sie kümmert?

- Ja
- Nein

### Wie ist Ihre Gesundheit im Allgemeinen?

- Sehr gut
- gut
- mittelmässig
- schlecht
- sehr schlecht

### Rauchen Sie?

- ja
- nein, noch nie
- nein, sistiert

### Ausbildung

- keine abgeschlossene Schulbildung
- obligatorische Volksschule
- Berufslehre / Berufsschule
- Maturitätsschule
- Höhere Fach- oder Berufsschule
- Universität, Hochschule
- unbekannt

### Berufliche Situation derzeit

- erwerbstätig 100% (auch wenn arbeitsunfähig / krank)
- erwerbstätig Teilzeit (auch wenn arbeitsunfähig / krank)
- in Ausbildung / Umschulung
- Haushalt / Freiwilligentätigkeit
- keine Tätigkeit
- arbeitslos gemeldet
- IV-Bezüger (Invalidenrente)
- AHV-Bezüger (Altersrente)
- andere
- unbekannt

## Eintrittsstatus

Patient intubiert eingeliefert  
(KPS=20; mRS=5; kognitiv=unbekannt)

|                                      |      |            |                                                                                       |
|--------------------------------------|------|------------|---------------------------------------------------------------------------------------|
| <b>Karnofsky-Index</b>               | 90 % | 29.12.2021 |  |
| <b>Glasgow Coma Score</b>            | 15   | 29.12.2021 |  |
| <b>Modified Rankin Scale</b>         | 1    | 29.12.2021 |  |
| <b>Modifizierte NIH Stroke Scale</b> | n.d. | 29.12.2021 |  |

**Verhalten**  adäquat  auffällig  unbekannt

### Montreal Cognitive Assessment

Nicht erhoben

**Epileptischer Anfall präoperativ?**  ja  nein  unbekannt

### Neurostatus

Neurostatus löschen 

### Internistischer Status

Internistischer Status löschen 

## 2 Surgery Case Report Form (sCRF)

### CRF Operationsbericht

#### Indikation für heutigen Eingriff

Neoplasie

#### Eingriff

Resektion

#### Lokalisation

Precentral gyrus

#### Kontext

Erstoperation:  ja  nein

Wurde der Operationstermin verschoben?  nein  ja, medizinisch indiziert  ja, organisatorisch

#### Einschätzung Tumor-Resektion

##### Gliom

Complete resection  GTR (>98%)  Subtotal resection (>90%)  Partial resection (<90%)  Biopsy

##### Metastase / anderer Tumor

Totalentfernung  Partielle Entfernung  Biopsie

Meningeom Simpson  1  2  3  4  5

#### ASA Klasse

I  II  III  IV  V

## 2.1 Lokalisation

- ICA
- ACA proximal / ACom
- ACA distal
- MCA proximal
- MCA distal
- Hinterer Kreislauf

△

### Zentralregion

- Precentral gyrus
- Postcentral gyrus
- Subcentral gyrus
- Paracentral lobule
- Insula
  - Short insular gyri
  - Long insular gyri
- Hemisphärisch andere
  - Frontal Lobe
    - Superior frontal gyrus
    - Middle frontal gyrus
    - Inferior frontal gyrus
    - Orbital gyri
  - Parietal Lobe
    - Superior parietal lobule
    - Angular gyrus
    - Supramarginal gyrus
    - Precuneus
  - Temporal Lobe
    - Superior temporal gyrus
    - Middle temporal gyrus
    - Inferior temporal gyrus
    - Lateral occipito-temporal gyrus (fusiformis)
    - Medial occipito-temporal gyrus (parahippocampus)
  - Occipital Lobe
    - Superior occipital gyrus
    - Middle occipital gyrus
    - Inferior occipital gyrus
    - Cuneus
    - Lingual gyrus

- Limbic lobe
  - Subcallosal area
  - Cingulate gyrus
  - Isthmus of the cingulate gyrus
  - Parahippocampal gyrus
  - Uncus
- White matter of telencephalon
  - Corona radiata
  - Internal capsule
  - Corpus callosum
- Deep (not basal ganglia or thalamus)
  - Basal forebrain
  - Hypothalamus

- Stammganglien / Thalamus
  - Thalamus
  - Basal ganglia
- Pinealis Region
- Hypophyse
- Hirnstamm
  - Midbrain
  - Pons
  - Medulla oblongata
- Kleinhirn
  - Hemisphere of cerebellum
  - Vermis
- Intraventrikulär
  - Lateral ventricle
  - Third ventricle
  - Fourth ventricle
- Hippocampus / Amygdala
  - Hippocampus
  - Amygdala

△

- Vordere Schädelgrube (inkl. Nase, Orbita)
- Mittlere Schädelgrube (inkl. Sella, Sinus Cavernosus)
- Hintere Schädelgrube (inkl. Kraniozervikaler Übergang)
- Konvexität / Falx

△

- Spinal

△

- Körperstamm

△

- Sonstige

### 3 Discharge Case Report Form (dCRF)

CRF Austritt

Kaderarzt Visum

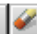

#### Austrittsdaten

##### Art des Austritts (AQC)

- geheilt (erwartetes Resultat erreicht)
- gebessert
- nicht gebessert / unverändert
- verschlechtert
- nicht beurteilbar
- Exitus intraoperativ
- Exitus postoperativ
- Exitus ohne Zusammenhang mit OP
- Exitus innert 30 Tage nach OP

##### Aufenthalt nach Austritt (PRISMA)

- Todesfall
- Alltagsumfeld (Privathaushalt o. Ä.)
- Krankenhaus, Pflegeheim
- Altersheim, sozialmedizin. Institution
- Psychiatrische Klinik
- Rehabilitationsklinik
- anderes Krankenhaus
- andere
- unbekannt
- eigenes Spital / andere Abteilung

##### Behandlung nach Austritt (PRISMA)

- Todesfall
- geheilt oder kein Behandlungsbedarf
- ambulante Behandlung
- ambulante Pflege / Spitex
- stationäre Behandlung
- Rehabilitation
- andere
- unbekannt

Exitus Datum

#### Histopathologie

##### Neuroepitheliale Tumore

- Astrocytom Grad II
- Anaplastisches Astrozytom Grad III
- Glioblastom
- Gliosarkom
- Pilozytisches Astrocytom (WHO Grad I)
- Pleomorphes Xanthoastrocytom
- Subependymales Riesenzellastrozytom
- Oligodendrogliom (WHO Grad II und III)
- Ependymom
- Anaplastisches Ependymom
- Oligoastrozytom
- Plexuspapillom
- Gangliocytom
- Pineocytom
- Pineoblastom
- Neuroblastom
- PNET (incl. Medulloblastom)

##### Meningeale Tumore

- Meningeom (WHO Grad I)
- Atypisches Meningeom (WHO Grad II)
- Anaplastisches Meningeom (WHO Grad III)

##### Metastatische Tumore

- Metastase

#### Komplikationen

Gab es Komplikationen im peri-/postoperativen Verlauf?  ja  nein  unbekannt

##### Tumore von Hirn- und Spinalnerven

- Schwannom
- Neurofibrom
- Maligner peripherer Nervenscheidentumor

##### Hämatopoetische Neoplasien

- Lymphom
- Plasmozytom

##### Stammzelltumore

- Germinom
- Embryonales Carcinom
- Coriocarcinom
- Teratom

##### Cystische Tumore

- Rathke'sche Tasche Cyste
- Epidermoidcyste
- Dermoidcyste
- Kolloidcyste

##### Selläre Tumore

- Hypophysenadenom
- Kraniopharyngeom
- Andere

### Bildgebung und Diagnose

**Zerebrovaskulär** Datum der aktuellen Bildgebung:    
Aktuelle Bildgebung vorhanden?  Ja  Nein  unbekannt

**Aneurysma** Komplette Occlusion/Resektion  Ja  Nein  unbekannt  
Bypass durchgängig  Ja  Nein  unbekannt

**AVM/dAVF/Cavernom** Komplette Occlusion/Resektion  Ja  Nein  unbekannt

**Stroke** Neue Ischämie  Ja  Nein  unbekannt  
Bypass durchgängig  Ja  Nein  unbekannt  
Wiedereröffnung Gefäss  Ja  Nein  unbekannt

**Tumor** Datum der aktuellen Bildgebung:    
Postop. CT/MRI vorhanden?  Ja  Nein  unbekannt  
In Tumorboard besprochen?  Ja  Nein  unbekannt

### Tumorentfernung retrospektiv (anhand postop. CT/MRI)

#### Gliom

Complete resection  GTR(>98%)  Subtotal resection (>90%)  Partial resection (<90%)  Biopsy

#### Metastase / anderer Tumor

Totalentfernung  Partielle Entfernung  Biopsie

### Austrittsstatus

Karnofsky-Index

Modified Rankin Scale

Modifizierte NIH Stroke Scale

Verhalten  adäquat  auffällig  unbekannt

Montreal Cognitive Assessment   max. 30 Punkte  Nicht erhoben

Epileptischer Anfall postoperativ?  ja  nein  unbekannt

## 4 Follow-up Case Report Form (fCRF)

### CRF-Sprechstunde

#### Zustand derzeit

##### Zustand derzeit (AQC)

- geheilt (erwartetes Resultat erreicht)
- gebessert
- nicht gebessert / unverändert
- verschlechtert
- nicht beurteilbar

##### Aufenthalt derzeit (PRISMA)

- Todesfall
- Alltagsumfeld (Privathaushalt o. Ä.)
- Krankenhaus, Pflegeheim
- Altersheim, sozialmedizin. Institution
- Psychiatrische Klinik
- Rehabilitationsklinik
- anderes Krankenhaus
- andere
- unbekannt
- eigenes Spital / andere Abteilung

##### Behandlung derzeit (PRISMA)

- Todesfall
- geheilt oder kein Behandlungsbedarf
- ambulante Behandlung
- ambulante Pflege / Spitex
- stationäre Behandlung
- Rehabilitation
- andere
- unbekannt

Exitus Datum

#### Bildgebung und Diagnose

##### Tumor

Datum der aktuellen Bildgebung:

Aktuelle Bildgebung vorhanden?  Ja  Nein

##### Zerebrovaskulär

Datum der aktuellen Bildgebung:

Aktuelle Bildgebung vorhanden?  Ja  Nein

#### Komplikationen

Gab es Komplikationen im peri-/postoperativen Verlauf?  ja  nein  unbekannt

#### Soziales Umfeld und Ressourcen (Fragen an den Patienten)

##### Wie ist Ihre Gesundheit im Allgemeinen?

- Sehr gut
- gut
- mittelmässig
- schlecht
- sehr schlecht

##### Sind Sie mit Ihrer Narbe zufrieden?

- Ja
- Nein

##### Rauchen Sie?

- ja
- nein, noch nie
- nein, sistiert

##### Berufliche Situation derzeit

- erwerbstätig 100% (auch wenn arbeitsunfähig / krank)
- erwerbstätig Teilzeit (auch wenn arbeitsunfähig / krank)
- in Ausbildung / Umschulung
- Haushalt / Freiwilligentätigkeit
- keine Tätigkeit
- arbeitslos gemeldet
- IV-Bezüger (Invalidenrente)
- AHV-Bezüger (Altersrente)
- andere
- unbekannt

Karnofsky-Index

Modified Rankin Scale

Modifizierte NIH Stroke Scale

Verhalten  adäquat  auffällig  unbekannt

Montreal Cognitive Assessment  max. 30 Punkte  Nicht erhoben

Epileptischer Anfall seit letzter Visite?  ja  nein  unbekannt

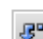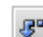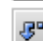

Supplement: mmc1.pdf [file mmc1.pdf]
